# Supplementary material for: Two unusual organic–inorganic hybrid 3-D frameworks based on Keggin-type heteropoly blue anion-chains, 40-membered macrocycles, and sodium linker units
Source: Royal Society of Chemistry journal article supplement (doi:10.1039/c4ce01029a), 2014-07-14
Supplement: c4ce01029a1.pdf [file c4ce01029a1.pdf]

## Two unusual organic-inorganic hybrid 3-D frameworks based on Keggin-type heteropoly blues anion-chain, 40-membered macrocycles, and sodium as linker units

He Zhang<sup>a,b</sup>, Kai Yu<sup>\*a,b</sup>, Song Gao<sup>c</sup>, Chunmei Wang<sup>a,b</sup>, Chunxiao Wang<sup>a,b</sup>, Haiyan Wang<sup>c</sup>,  
Baibin Zhou<sup>\*a,b,1</sup>

### 1. Structural figures

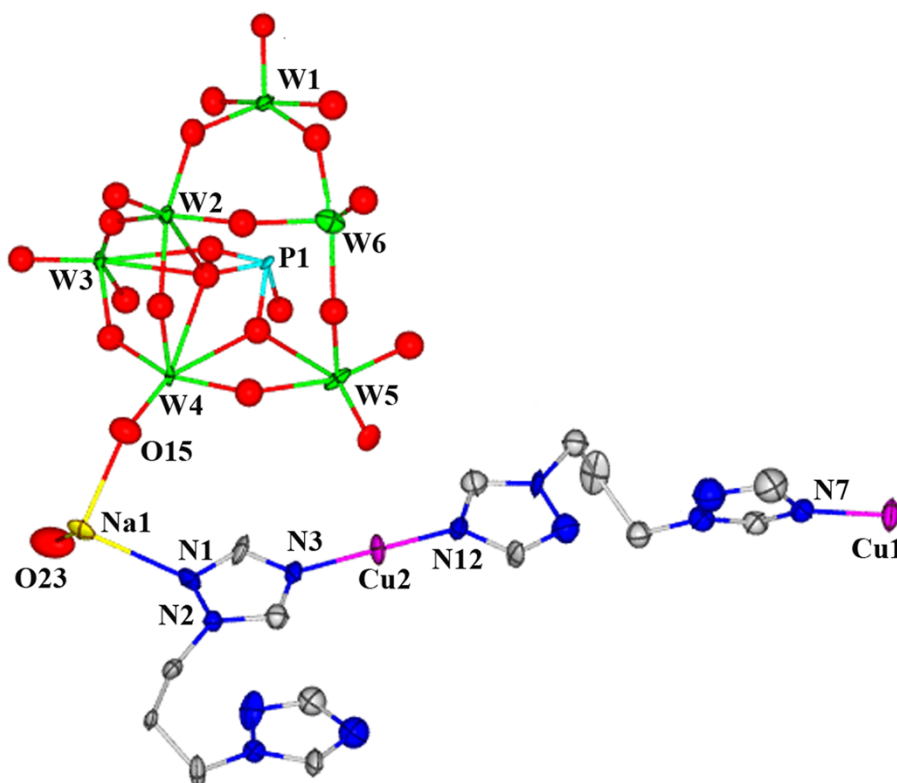

Figure S1 ORTEP view of the basic units in compound **1** with 50% thermal ellipsoid.

\* Corresponding author: Address: E-mail address: [hlyukai188@163.com](mailto:hlyukai188@163.com) (K.Yu), [zhou\\_bai\\_bin@163.com](mailto:zhou_bai_bin@163.com) (B. B. Zhou)

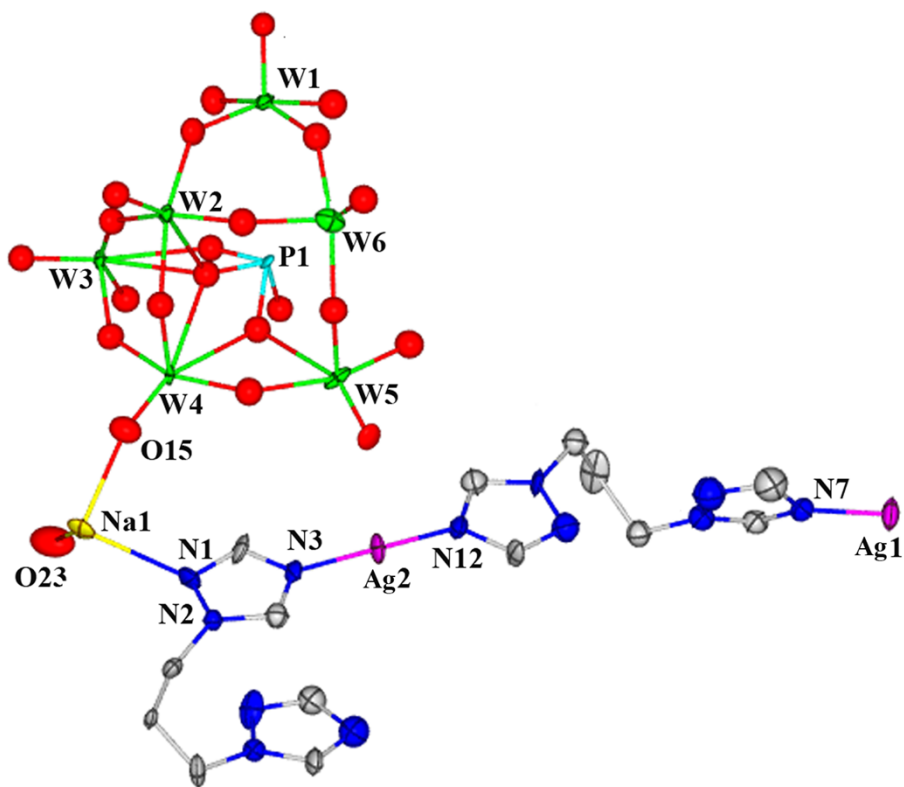

**Figure S2** ORTEP view of the basic units in compound **2** with 50% thermal ellipsoid.

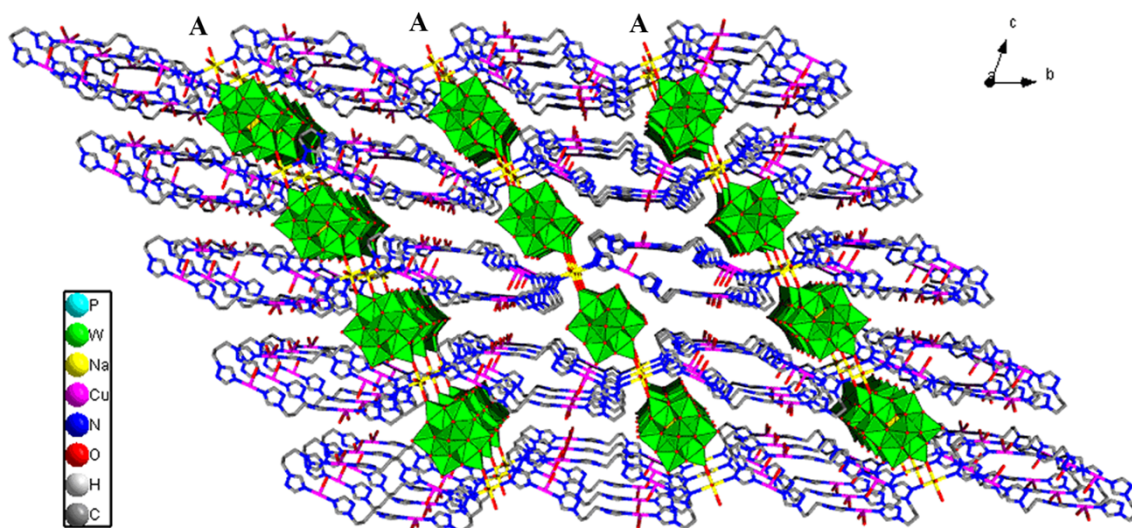

**Figure S3** The 3D framework formed by {Na(H<sub>2</sub>O)<sub>2</sub>}, 40-membered macrocycles and 2D layer in A-A mode via Na-N bond (The Keggin cluster linked with Cu atoms of 40-membered macrocycles are omitted for clarity (B layer)).

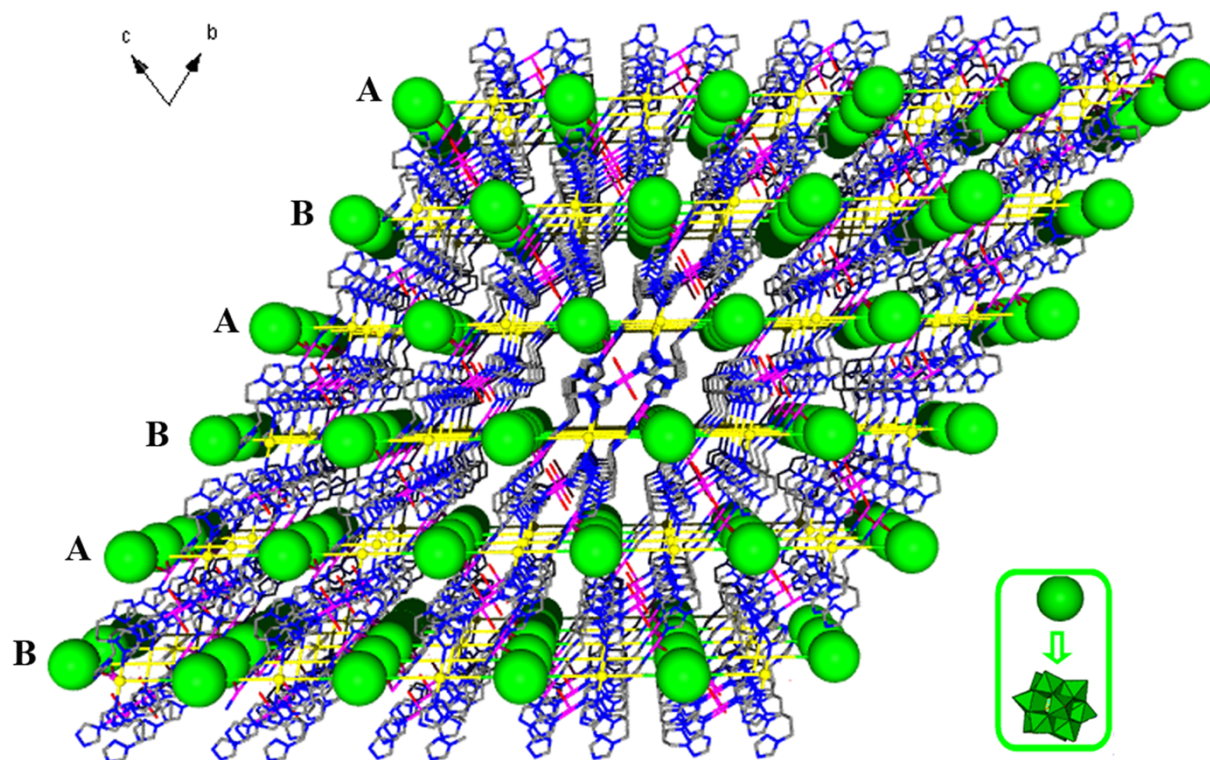

**Figure S4.** The simplified 3-D framework view of compound **1** formed by  $\{\text{Na}(\text{H}_2\text{O})_2\}$ , 40-membered macrocycles and 2D layer in A-B-A-B mode.

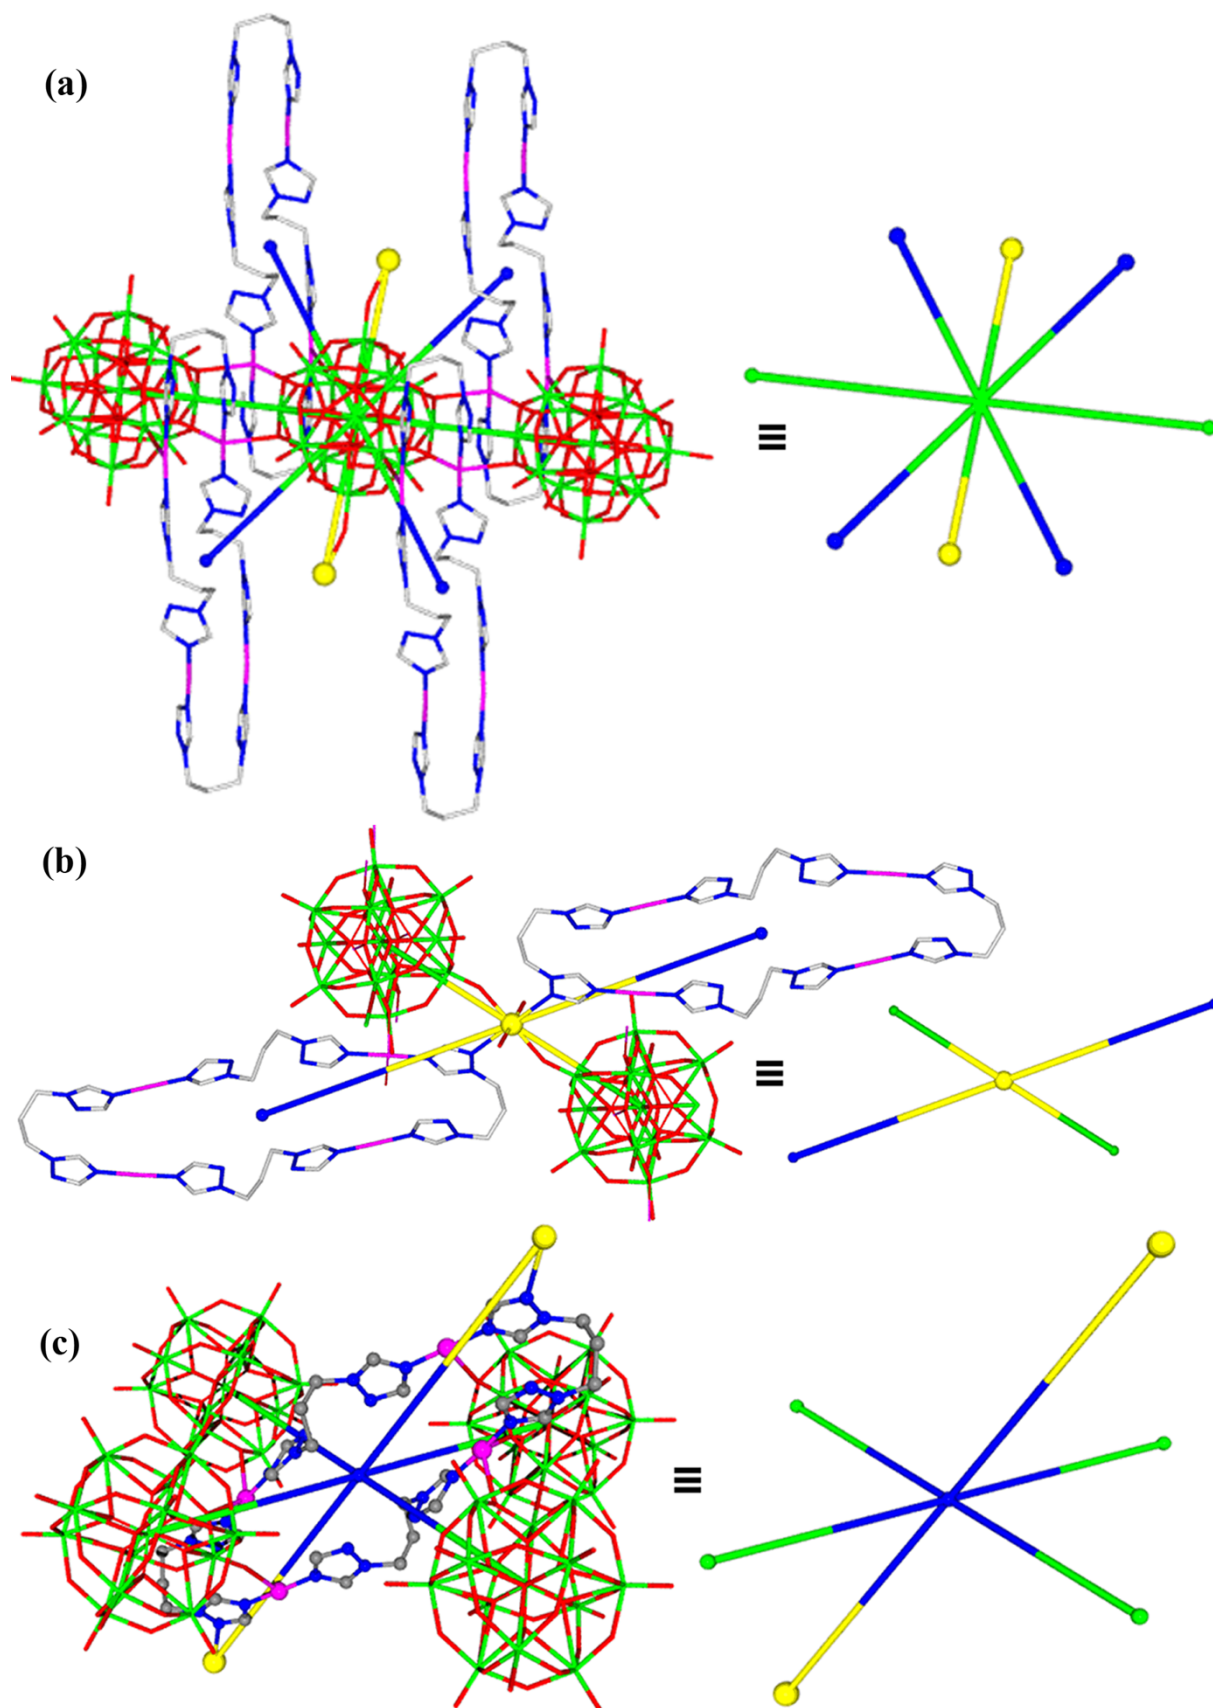

Figure S5 The details of simplify for Topology of compound 1

## 2. Structural data

**Table S1** Selected bond lengths (Å) and bond angles (°) of compound **1**

|                     |           |                       |           |                      |           |
|---------------------|-----------|-----------------------|-----------|----------------------|-----------|
| W(1)-O(1)           | 1.70(2)   | W(2)-O(6)             | 1.68(3)   | W(3)-O(10)           | 1.69(2)   |
| W(1)-O(4)           | 1.83(3)   | W(2)-O(9)             | 1.82(3)   | W(3)-O(11)           | 1.85(3)   |
| W(1)-O(2)           | 1.88(3)   | W(2)-O(7)             | 1.91(2)   | W(3)-O(12)           | 1.87(2)   |
| W(1)-O(3)           | 1.93(3)   | W(2)-O(5)             | 1.92(3)   | W(3)-O(7)            | 1.92(2)   |
| W(1)-O(5)           | 1.92(3)   | W(2)-O(8)             | 1.93(2)   | W(3)-O(19)#1         | 1.91(3)   |
| W(1)-O(22)#1        | 2.39(4)   | W(2)-O(22)#1          | 2.36(4)   | W(3)-O(14)           | 2.37(4)   |
| W(4)-O(15)          | 1.67(3)   | W(5)-O(18)            | 1.72(2)   | W(6)-O(9)            | 1.91(3)   |
| W(4)-O(16)          | 1.86(3)   | W(5)-O(20)            | 1.84(3)   | W(6)-O(20)           | 1.91(3)   |
| W(4)-O(8)           | 1.88(3)   | W(5)-O(19)            | 1.88(3)   | W(6)-O(4)            | 1.93(3)   |
| W(4)-O(2)#1         | 1.87(3)   | W(5)-O(3)#1           | 1.91(3)   | W(6)-O(11)#1         | 1.93(3)   |
| W(4)-O(12)          | 1.92(2)   | W(5)-O(16)            | 1.921(3)  | W(6)-O(21)           | 1.940(2)  |
| W(4)-O(17)          | 2.37(5)   | W(5)-O(14)#1          | 2.48(4)   | W(6)-O(22)#1         | 2.52(4)   |
| P(1)-O(13)          | 1.45(4)   | P(1)-O(17)#1          | 1.51(4)   | P(1)-O(14)#1         | 1.51(4)   |
| P(1)-O(13)#1        | 1.45(4)   | P(1)-O(17)            | 1.51(5)   | P(1)-O(14)           | 1.51(4)   |
| P(1)-O(22)#1        | 1.59(4)   | Na(1)-O(15)           | 2.31(3)   | Na(1)-O(23)#3        | 2.38(4)   |
| P(1)-O(22)          | 1.59(4)   | Na(1)-O(15)#3         | 2.31(3)   | Na(1)-O(23)          | 2.38(4)   |
| Na(1)-N(1)          | 2.74(3)   | Cu(1)-N(6)#2          | 1.88(4)   | Cu(2)-N(12)          | 1.88(3)   |
| Na(1)-N(1)#3        | 2.74(3)   | Cu(1)-N(7)            | 1.88(3)   | Cu(2)-N(3)           | 1.89(3)   |
| O(1)-W(1)-O(4)      | 102.8(13) | O(6)-W(2)-O(9)        | 105.0(13) | O(10)-W(3)-O(11)     | 102.3(13) |
| O(1)-W(1)-O(2)      | 102.0(13) | O(6)-W(2)-O(7)        | 101.9(12) | O(10)-W(3)-O(12)     | 101.2(12) |
| O(1)-W(1)-O(3)      | 101.1(15) | O(6)-W(2)-O(5)        | 100.5(13) | O(10)-W(3)-O(7)      | 102.9(12) |
| O(1)-W(1)-O(5)      | 99.8(12)  | O(6)-W(2)-O(8)        | 100.6(12) | O(10)-W(3)-O(19)#1   | 102.2(13) |
| O(1)-W(1)-O(22)#1   | 161.1(14) | O(6)-W(2)-O(22)#1     | 162.9(14) | O(10)-W(3)-O(14)     | 163.2(14) |
| O(15)-W(4)-O(16)    | 100.4(14) | O(18)-W(5)-O(20)      | 103.2(12) | O(9)-W(6)-O(20)      | 89.0(12)  |
| O(15)-W(4)-O(8)     | 101.8(12) | O(18)-W(5)-O(19)      | 102.3(12) | O(9)-W(6)-O(4)       | 87.5(12)  |
| O(15)-W(4)-O(2)#1   | 102.9(13) | O(18)-W(5)-O(3)#1     | 100.5(15) | O(9)-W(6)-O(11)#1    | 158.0(12) |
| O(15)-W(4)-O(12)    | 102.5(13) | O(18)-W(5)-O(16)      | 100.9(12) | O(9)-W(6)-O(21)      | 99.0(8)   |
| O(15)-W(4)-O(17)    | 159.4(15) | O(18)-W(5)-O(14)#1    | 161.8(13) | O(9)-W(6)-O(22)#1    | 61.9(13)  |
| O(17)#1-P(1)-O(17)  | 180       | O(17)#1-P(1)-O(14)    | 75(2)     | O(17)-P(1)-O(22)#1   | 109(2)    |
| O(17)#1-P(1)-       | 105(2)    | O(17)-P(1)-O(14)      | 105(2)    | O(17)#1-P(1)-O(22)   | 109(2)    |
| O(17)-P(1)-O(14)#1  | 75(2)     | O(17)#1-P(1)-O(22)#1  | 71(2)     | O(17)-P(1)-O(22)     | 71(2)     |
| O(15)-Na(1)-O(15)#3 | 180       | O(15)#3-Na(1)-O(23)#3 | 93.0(11)  | O(15)#3-Na(1)-O(23)  | 87.0(11)  |
| O(15)-Na(1)-O(23)#3 | 87.0(11)  | O(15)-Na(1)-O(23)     | 93.0(11)  | O(15)-Na(1)-N(1)     | 90.2(10)  |
| O(15)#3-Na(1)-N(1)  | 89.8(10)  | O(15)-Na(1)-N(1)#3    | 89.8(10)  | O(15)#3-Na(1)-N(1)#3 | 90.2(10)  |

**Table S2** Selected bond lengths (Å) and bond angles (°) of compound **2**

|              |         |              |         |              |         |
|--------------|---------|--------------|---------|--------------|---------|
| W(1)-O(1)    | 1.73(2) | W(2)-O(6)    | 1.68(3) | W(3)-O(10)   | 1.69(2) |
| W(1)-O(4)    | 1.88(3) | W(2)-O(9)    | 1.83(2) | W(3)-O(11)   | 1.84(3) |
| W(1)-O(2)    | 1.86(3) | W(2)-O(5)    | 1.91(3) | W(3)-O(12)   | 1.88(3) |
| W(1)-O(5)    | 1.89(3) | W(2)-O(8)    | 1.92(3) | W(3)-O(7)    | 1.92(3) |
| W(1)-O(3)    | 1.94(3) | W(2)-O(7)    | 1.94(3) | W(3)-O(19)#1 | 1.94(3) |
| W(1)-O(22)#1 | 2.37(6) | W(2)-O(22)#1 | 2.39(6) | W(3)-O(14)   | 2.40(6) |
| W(4)-O(15)   | 1.70(3) | W(5)-O(18)   | 1.71(2) | W(6)-O(9)    | 1.93(2) |
| W(4)-O(8)    | 1.87(3) | W(5)-O(19)   | 1.83(3) | W(6)-O(11)#1 | 1.91(3) |
| W(4)-O(16)   | 1.87(3) | W(5)-O(20)   | 1.89(3) | W(6)-O(20)   | 1.93(3) |
| W(4)-O(2)#1  | 1.92(3) | W(5)-O(3)#1  | 1.93(3) | W(6)-O(4)    | 1.94(3) |

|                     |           |                       |           |                      |            |
|---------------------|-----------|-----------------------|-----------|----------------------|------------|
| W(4)-O(12)          | 1.93(3)   | W(5)-O(16)            | 1.95(3)   | W(6)-O(21)           | 1.9403(18) |
| W(4)-O(17)          | 2.36(6)   | W(5)-O(14)#1          | 2.45(6)   | W(6)-O(22)#1         | 2.47(6)    |
| P(1)-O(13)#1        | 1.49(6)   | P(1)-O(17)#1          | 1.54(6)   | P(1)-O(14)           | 1.56(6)    |
| P(1)-O(13)          | 1.49(6)   | P(1)-O(17)            | 1.54(6)   | P(1)-O(14)#1         | 1.56(6)    |
| P(1)-O(22)          | 1.63(6)   | Na(1)-O(15)#4         | 2.30(3)   | Na(1)-O(23)#4        | 2.38(4)    |
| P(1)-O(22)#1        | 1.63(6)   | Na(1)-O(15)           | 2.30(3)   | Na(1)-O(23)          | 2.38(4)    |
| Na(1)-N(1)          | 2.76(3)   | Ag(1)-N(7)            | 1.88(3)   | Ag(2)-N(3)           | 1.90(3)    |
| Na(1)-N(1)#4        | 2.76(3)   | Ag(1)-N(6)#2          | 1.92(4)   | Ag(2)-N(12)          | 1.91(3)    |
| O(1)-W(1)-O(4)      | 103.1(13) | O(6)-W(2)-O(9)        | 103.5(14) | O(10)-W(3)-O(11)     | 102.7(14)  |
| O(1)-W(1)-O(2)      | 102.6(13) | O(6)-W(2)-O(5)        | 101.1(13) | O(10)-W(3)-O(12)     | 102.0(13)  |
| O(1)-W(1)-O(5)      | 102.3(13) | O(6)-W(2)-O(8)        | 102.1(13) | O(10)-W(3)-O(7)      | 102.3(13)  |
| O(1)-W(1)-O(3)      | 98.8(13)  | O(6)-W(2)-O(7)        | 100.4(13) | O(10)-W(3)-O(19)#1   | 104.6(13)  |
| O(1)-W(1)-O(22)#1   | 161.4(17) | O(6)-W(2)-O(22)#1     | 160.2(17) | O(10)-W(3)-O(14)     | 160.0(17)  |
| O(15)-W(4)-O(8)     | 102.6(13) | O(18)-W(5)-O(19)      | 104.2(13) | O(9)-W(6)-O(11)#1    | 156.9(13)  |
| O(15)-W(4)-O(16)    | 99.3(13)  | O(18)-W(5)-O(20)      | 102.7(13) | O(9)-W(6)-O(20)      | 89.6(12)   |
| O(15)-W(4)-O(2)#1   | 103.9(14) | O(18)-W(5)-O(3)#1     | 98.7(13)  | O(9)-W(6)-O(4)       | 87.6(11)   |
| O(15)-W(4)-O(12)    | 102.8(13) | O(18)-W(5)-O(16)      | 100.7(12) | O(9)-W(6)-O(21)      | 98.2(9)    |
| O(15)-W(4)-O(17)    | 158.5(17) | O(18)-W(5)-O(14)#1    | 160.7(16) | O(9)-W(6)-O(22)#1    | 63.2(16)   |
| O(17)#1-P(1)-O(17)  | 180       | O(17)#1-P(1)-O(14)#1  | 106(3)    | O(17)-P(1)-O(22)     | 71(3)      |
| O(17)#1-P(1)-O(14)  | 74(3)     | O(17)-P(1)-O(14)#1    | 74(3)     | O(17)#1-P(1)-O(22)#1 | 71(3)      |
| O(17)-P(1)-O(14)    | 106(3)    | O(17)#1-P(1)-O(22)    | 109(3)    | O(17)-P(1)-O(22)#1   | 109(3)     |
| O(15)#4-Na(1)-O(15) | 180       | O(15)#4-Na(1)-O(23)#4 | 92.4(11)  | O(15)-Na(1)-O(23)#4  | 87.6(11)   |
| O(15)#4-Na(1)-O(23) | 87.6(11)  | O(15)-Na(1)-O(23)     | 92.4(11)  | O(15)#4-Na(1)-N(1)   | 90.1(9)    |
| O(15)-Na(1)-N(1)    | 89.9(9)   | O(15)#4-Na(1)-N(1)#4  | 89.9(9)   | O(15)-Na(1)-N(1)#4   | 90.1(9)    |

Symmetry transformations used to generate equivalent atoms: #1 -x,-y,-z; #2 -x+1/2,-y+1/2,-z

### 3. Physical characterization

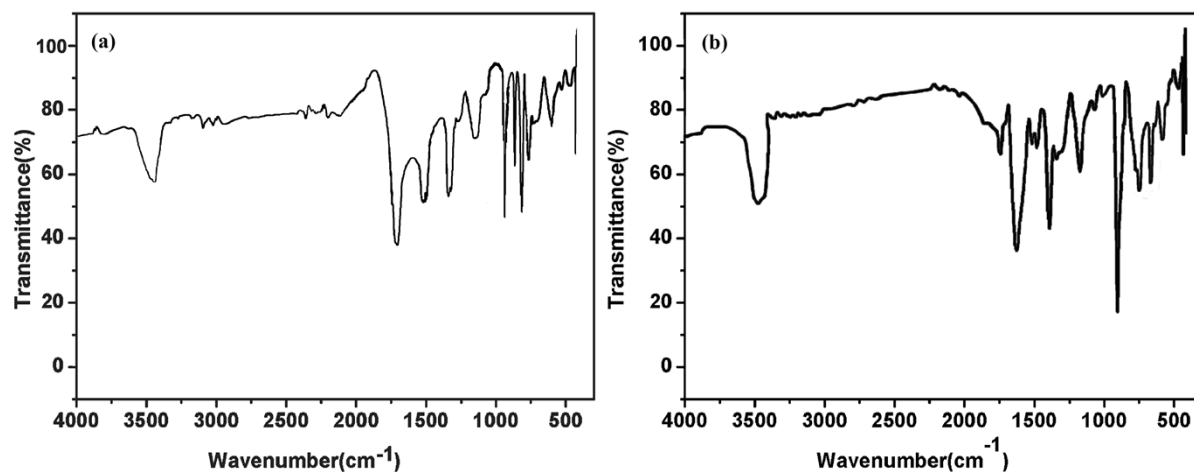

Figure S6 IR spectra of (a) compound 1 and (b) compound 2

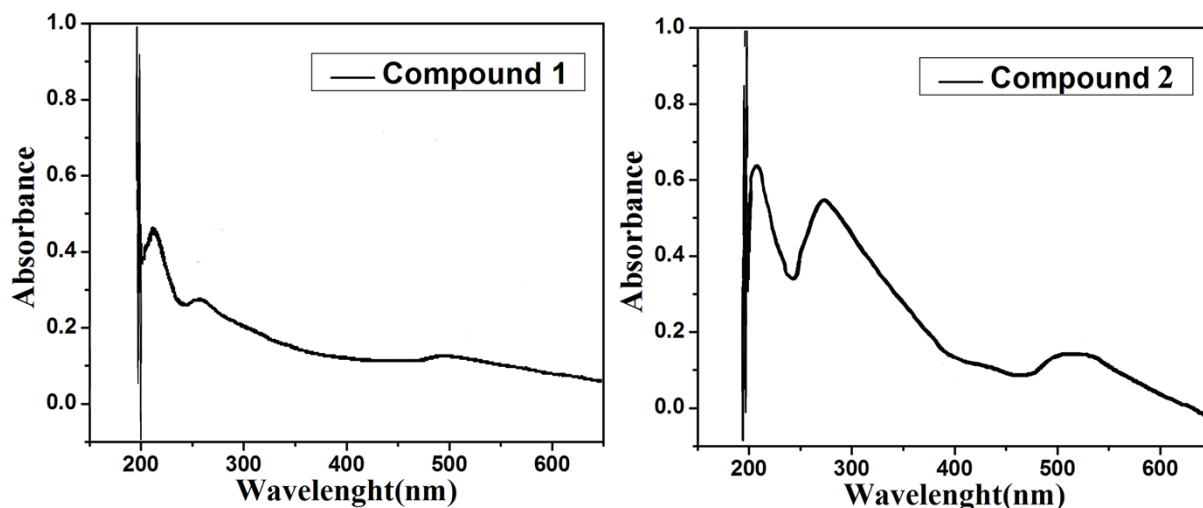

Figure S7 Solid state UV-vis spectra of compound 1 and compound 2

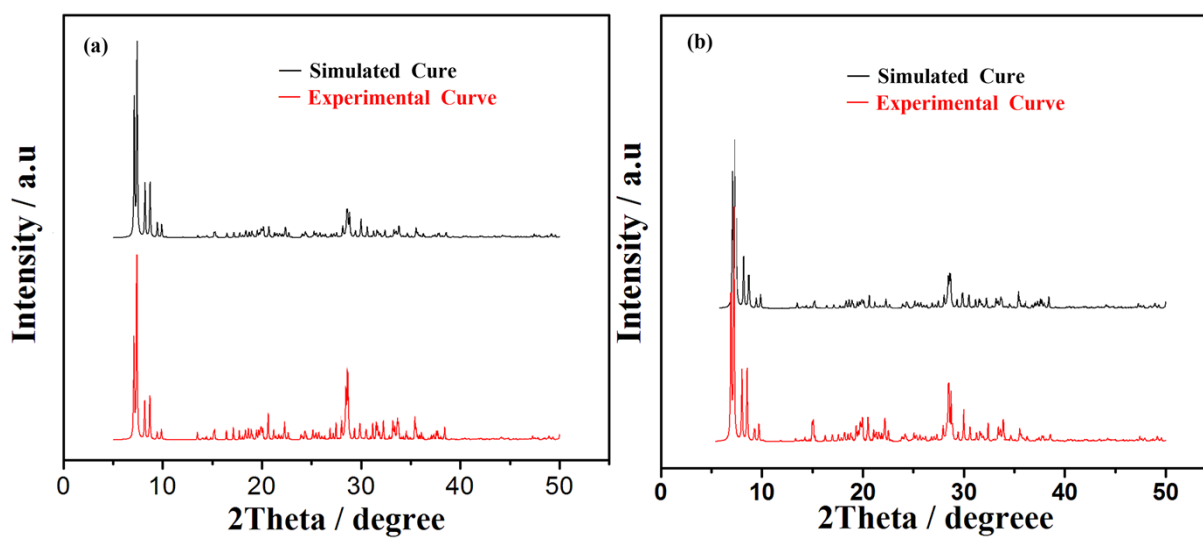

Figure S8 The PXRD contrast curves of (a) compound 1 and (b) compound 2

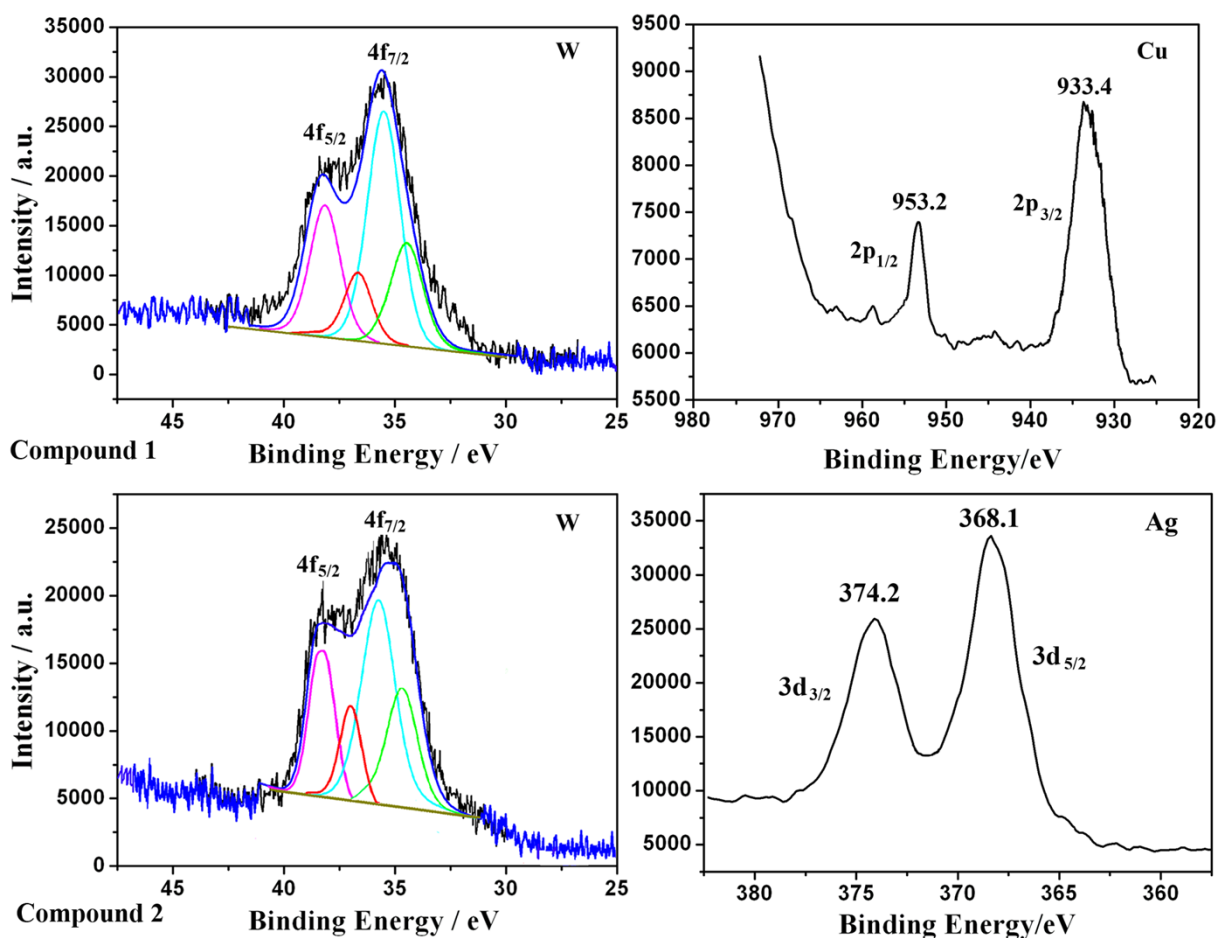

**Figure S9** The XPS spectra of W and Cu/Ag in compound 1 and compound 2.

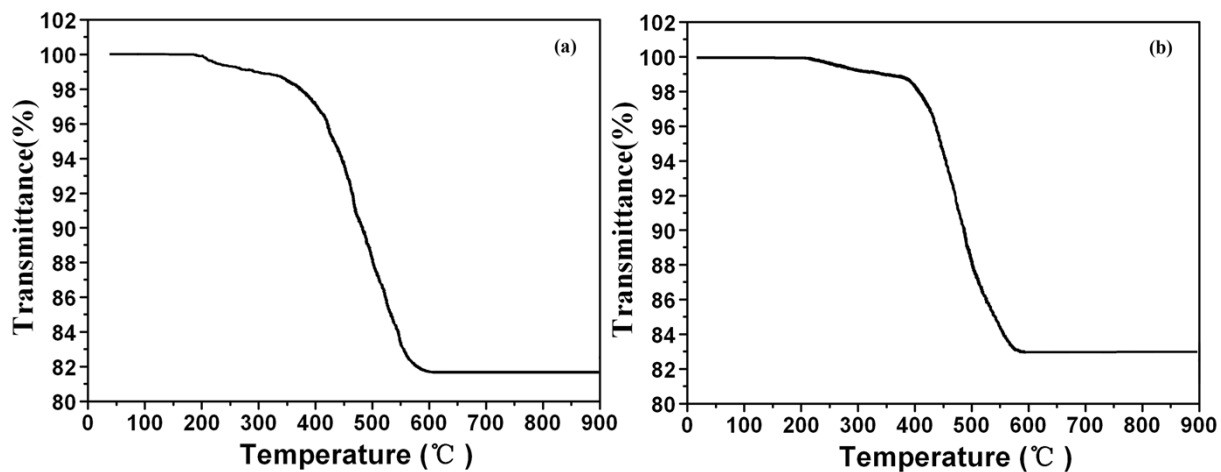

**Figure S10** TG curve of (a) compound 1 and (b) compound 2.



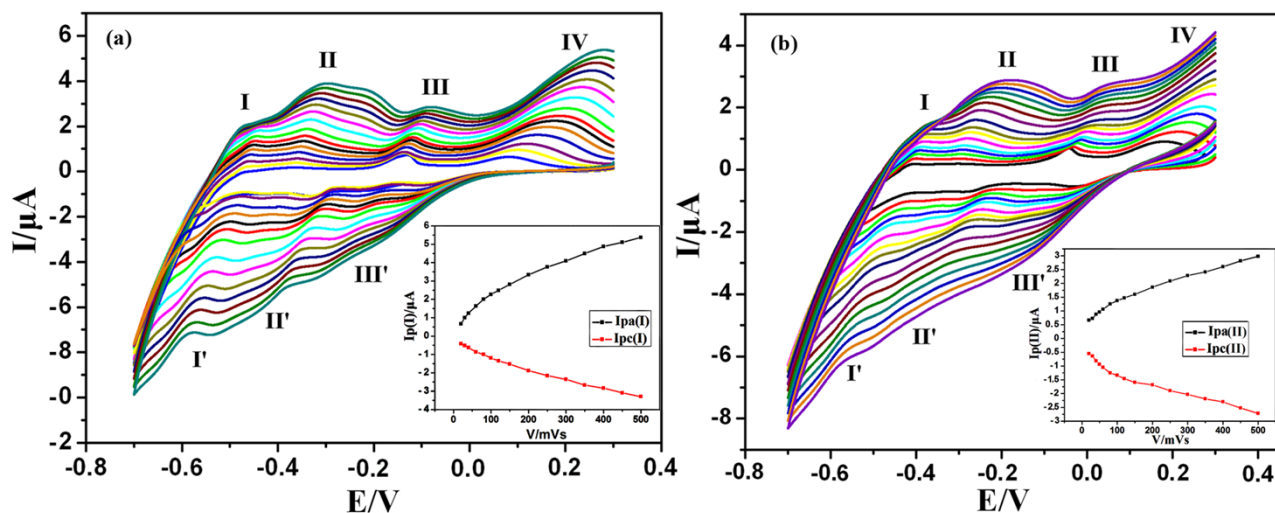

**Figure S11** Cyclic voltammograms of (a) 1-CPE and (b) 2-CPE (scan rates from inner to outer: 20, 30, 40, 60, 80, 100, 120, 150, 200, 250, 300, 350, 400, 450, 500  $\text{mV s}^{-1}$ ). Potentials vs. SCE. (Insert plots: The dependence of anodic peak II current on scan rates.)

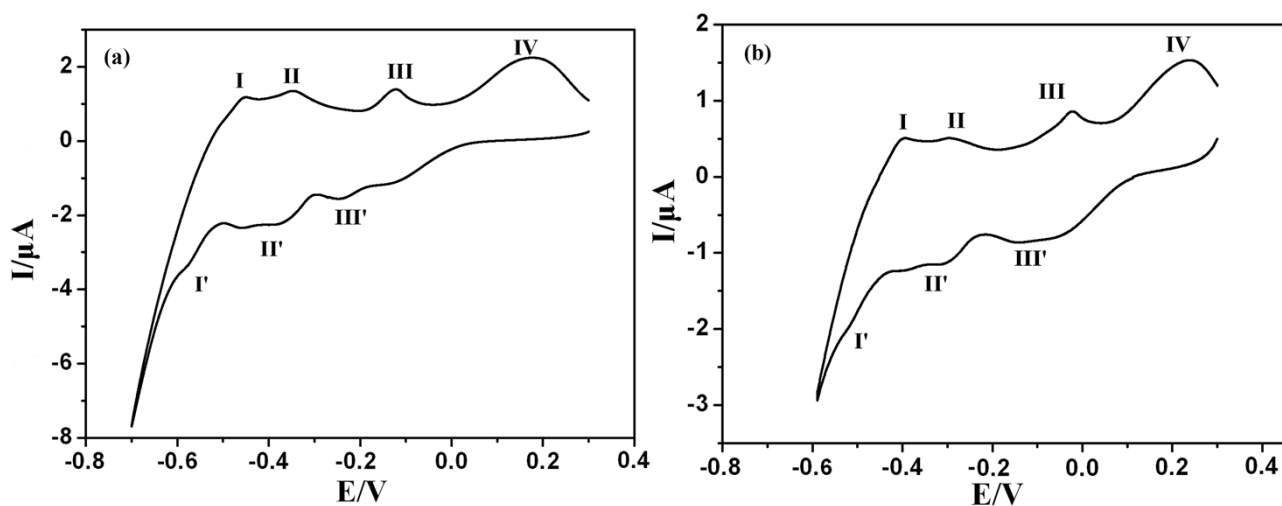

**Figure S12** Cyclic voltammograms of (a) 1-CPE and (b) 2-CPE in the 1.0 M  $\text{H}_2\text{SO}_4$  solution at scan rate of 40  $\text{mV s}^{-1}$ ; Potentials vs. SCE.
